## Grayzone myocardial fibrosis and ventricular arrhythmias in patients with a left ventricular ejection fraction greater than 35%

Zegard A.<sup>1</sup>; Okafor O.<sup>2</sup>; Debono J.<sup>2</sup>; Kalla M.<sup>2</sup>; Lencioni M.<sup>2</sup>; Marshall H.<sup>2</sup>; Hudsmith L.<sup>2</sup>; Qiu T.<sup>1</sup>; Steeds R.<sup>2</sup>; Stegemann B.<sup>1</sup>; Leyva F.<sup>1</sup>

<sup>1</sup>Aston University, Birmingham, United Kingdom of Great Britain & Northern Ireland

<sup>2</sup>Queen Elizabeth Hospital Birmingham, Birmingham, United Kingdom of Great Britain & Northern Ireland

**Funding Acknowledgements:** Type of funding sources: None.

**BACKGROUND** Clinical guidelines adopt LVEF cut-offs <30 or <35% as an indication for implantable cardioverter defibrillator (ICD) therapy. Most patients succumbing to sudden cardiac death (SCD), however, have a LVEF≥35%.

**OBJECTIVES** To determine whether myocardial fibrosis (MF) and grayzone fibrosis (GZF) on cardiovascular magnetic resonance (CMR) is associated with ventricular arrhythmias in patients with coronary artery disease (CAD) and a LVEF≥35%.

**METHODS** In this retrospective study of CAD patients, GZF mass using the 3SD method (GZF<sub>3SD</sub>) and total fibrosis mass using the 2SD method (TF<sub>2SD</sub>) on CMR were assessed in relation to the primary, combined endpoint of SCD, ventricular tachycardia, ventricular fibrillation or resuscitated cardiac arrest.

**RESULTS** Among 701 patients (age: 65.8 ± 12.3 yrs [mean ± SD]), 28 (3.99%) patients met the primary endpoint over 5.91 years (median; interquartile range 4.42-7.64). In competing risks analysis, a GZF<sub>3SD</sub> mass ≥ 5.0 g was strongly associated with the primary endpoint (sub-distribution hazard ratio [sHR]: 17.4 [95% CI 6.64-45.5]); area under receiver operator characteristic curve [AUC]: 0.85, p < 0.001). A weaker association was observed for TF<sub>2SD</sub> mass ≥ 23 g (HR: 10.4 [95% CI 4.22-25.8]; AUC: 0.80, p < 0.001). The range of sHRs for GZF<sub>3SD</sub> mass (1 to 526.6) was wider than for TF<sub>2SD</sub> mass (1 to 37.6).

**CONCLUSIONS** In CAD patients with a LVEF≥35%, GZF<sub>3SD</sub> mass was strongly associated with the arrhythmic endpoint. These findings hold promise for its use in identifying patients with CAD and a LVEF≥35% at risk of arrhythmic events.

Abstract Figure.

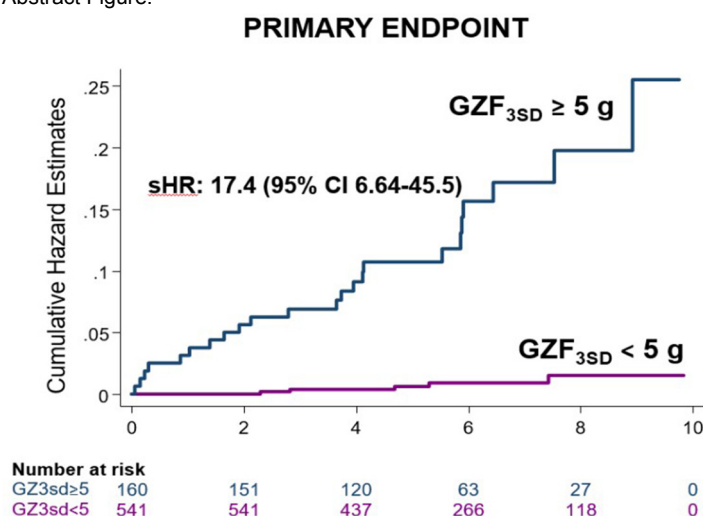

Source: http://academic.oup.com/europace/article-pdf/23/Supplement_3/euab116.363/38130609/euab116.363.pdf
